# Supplementary material for: A bacterial acetyltransferase triggers immunity in Arabidopsis thaliana independent of hypersensitive response
Source: PubMed Central journal article supplement (PMC5472582; doi:10.1038/s41598-017-03704-x), 2017-06-15
Supplement: 41598_2017_3704_MOESM1_ESM.pdf [file 41598_2017_3704_MOESM1_ESM.pdf]

# Supplementary Information:

## **A bacterial acetyltransferase triggers immunity in *Arabidopsis thaliana* independent of hypersensitive response**

Jay Jayaraman<sup>1,5,a</sup>, Sera Choi<sup>1,5,a</sup>, Maxim Prokchorchik<sup>1,5</sup>, Du Seok Choi<sup>5</sup>, Amandine Spiandore<sup>1</sup>, Erik H. Rikkerink<sup>2</sup>, Matthew D. Templeton<sup>2,3</sup>, Cécile Segonzac<sup>4,5</sup> and Kee Hoon Sohn<sup>1,5,6,\*</sup>

<sup>1</sup>Bioprotection Research Centre, Institute of Agriculture and Environment, Massey University, Palmerston North 4474, New Zealand

<sup>2</sup>New Zealand Institute for Plant & Food Research Limited (PFR), Private Bag 92169, Auckland, New Zealand

<sup>3</sup>School of Biological Sciences, University of Auckland, Private Bag 92019, Auckland, New Zealand

<sup>4</sup>Department of Plant Science, Plant Genomics and Breeding Institute, College of Agriculture and Life Sciences, Seoul National University, Seoul 08826, South Korea

<sup>5</sup>Department of Life Sciences and <sup>6</sup>School of Interdisciplinary Bioscience and Bioengineering, Pohang University of Science and Technology, Pohang 37673, South Korea

<sup>a</sup>These authors contributed equally to this research

\*Corresponding author. Email: [khsohn@postech.ac.kr](mailto:khsohn@postech.ac.kr)

## Supplementary Figure S1

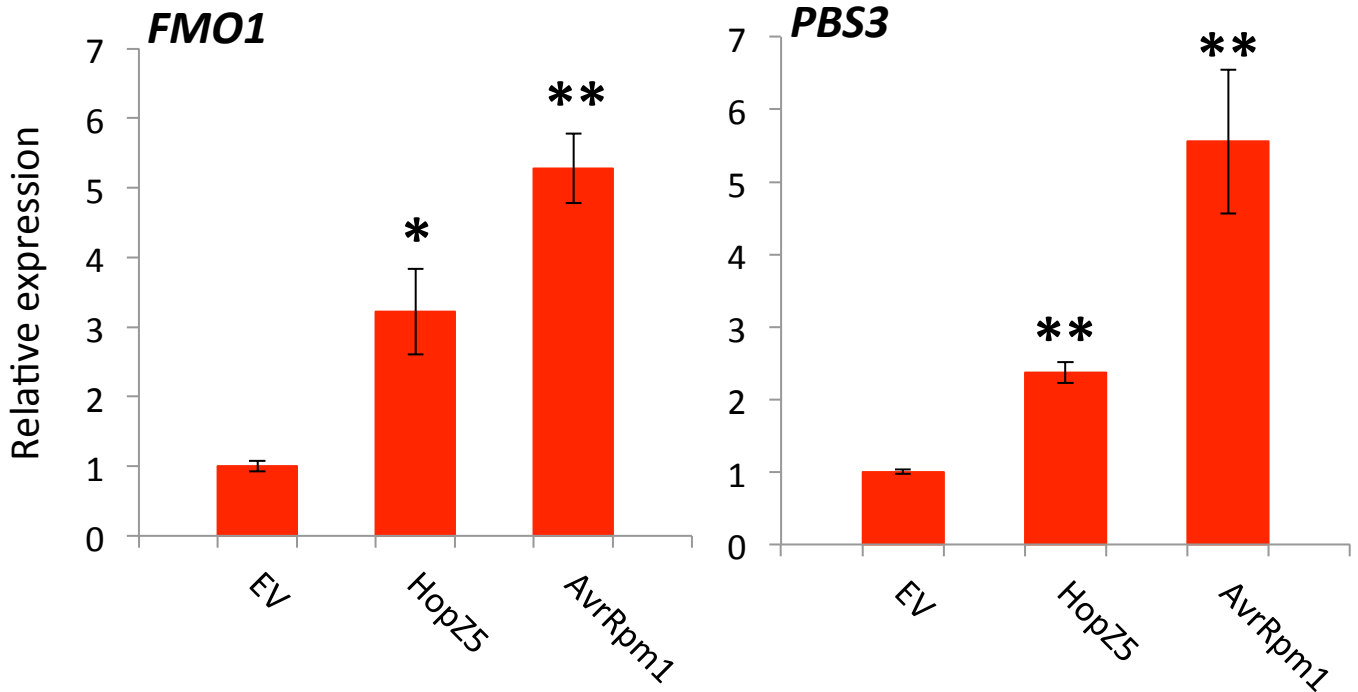

**Supplementary Figure S1. *Pto* DC3000-delivered HopZ5 triggers ETI in *Arabidopsis thaliana* Col-0.** Defence gene expression in *Arabidopsis* accession Col-0 in response to EV, HopZ5-HA or AvrRpm1. *Pto* DC3000 ( $2 \times 10^7$  CFU/mL) carrying EV, *hopZ5*-HA or *avrRpm1* was blunt syringe-infiltrated into leaves, samples taken at 8 hours post infiltration and defence gene expression determined from extracted RNA by quantitative polymerase chain reaction (qPCR). Expression for each defence gene is relative to internal *EF1 $\alpha$*  expression and defence gene expression for EV samples indicated. Error bars indicate standard error from three technical replicates. Asterisks indicate results of Student's t-test between selected sample and EV; \* ( $P < 0.05$ ), \*\* ( $P < 0.01$ ). The experiment was conducted twice with similar results.

## Supplementary Figure S2

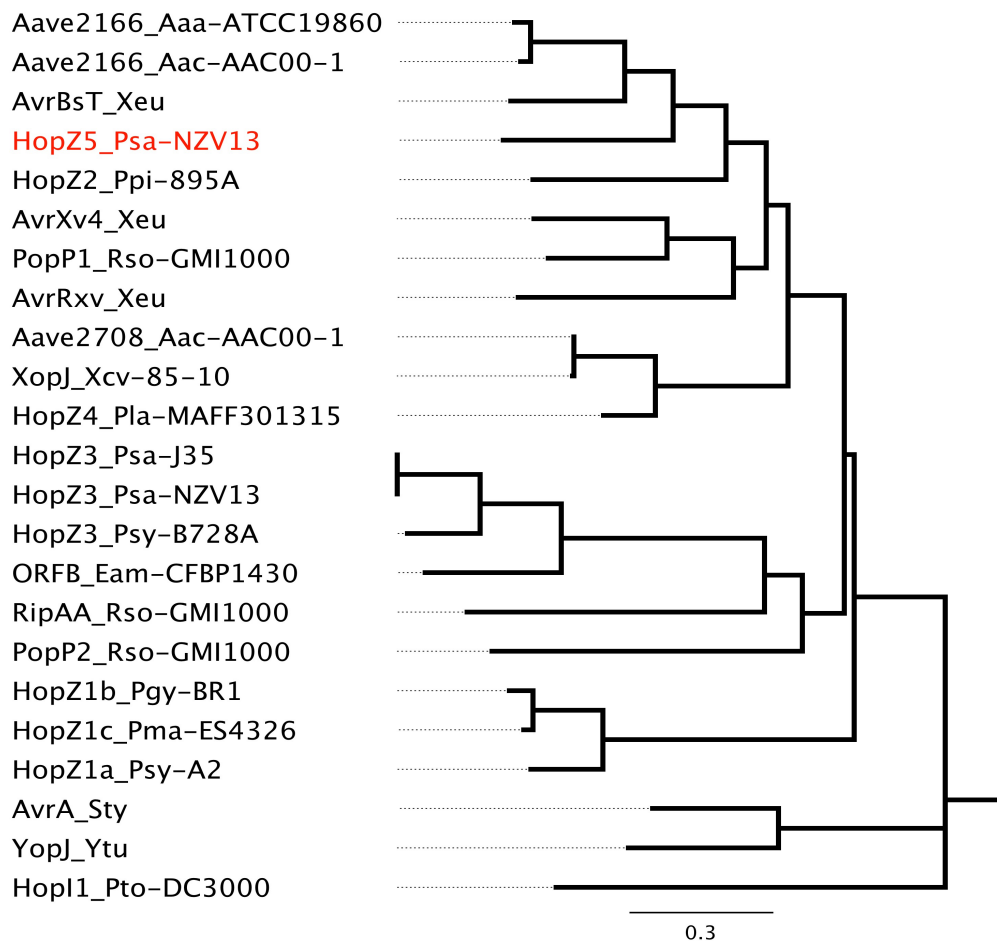

**Supplementary Figure S2. HopZ5 is a member of the YopJ family of putative acetyltransferases.** HopZ5 (in red) from *Pseudomonas syringae* pv. *actinidiae* NZV-13 is a putative acetyltransferase from the YopJ family with *Xanthomonas* type-III secreted effector AvrBsT as its closest homolog. Jukes Cantor neighbour-joining tree using HopI1 from *Pto* DC3000 as outgroup and root, generated in Geneious software with various YopJ-family members: Aave2166\_Aaa-ATCC19860 (*Acidovorax avenae* pv. *avenae* ATCC19860), Aave2166\_Aac-AAC00-1 (*Acidovorax citrulli* AAC00-1), AvrBsT\_Xeu (*Xanthomonas campestris* pv. *euvesicatoria* Bv5-4a), HopZ2\_Ppi-895A (*P. syringae* pv. *pisii* 895A), AvrXv4\_Xeu (*X. campestris* pv. *euvesicatoria* race T3), PopP1\_Rso-GMI1000 (*Ralstonia solanacearum* GMI1000), AvrRxv\_Xcv (*X. campestris* pv. *euvesicatoria* 85-10), Aave2708\_Aac-AAC00-1 (*Acidovorax citrulli* AAC00-1), XopJ\_Xcv-85-10 (*X. campestris* pv. *vesicatoria* 85-10), HopZ4\_Pla-MAFF301315 (*P. syringae* pv. *lachrymans* MAFF301315), HopZ3\_Psa-J35 (*P. syringae* pv. *actinidiae* J35), HopZ3\_Psa-NZV13 (*P. syringae* pv. *actinidiae* NZV-13), HopZ3\_Psy-B728A (*P. syringae* pv. *syringae* B728A), ORFB\_Eam-CFBP1430 (*Erwinia amylovora* str. CFBP1430), RipAA\_Rso-GMI1000 (*R. solanacearum* GMI1000), PopP2\_Rso-GMI1000 (*R. solanacearum* GMI1000), HopZ1b\_Pgy-BR1 (*P. syringae* pv. *glycinea* BR1), HopZ1c\_Pma-ES4326 (*P. syringae* pv. *maculicola* ES4326), HopZ1a\_Psy-A2 (*P. syringae* pv. *syringae* A2), AvrA\_Sty (*Salmonella typhimurium* str. 14028s), YopJ\_Ytu (*Yersinia pseudotuberculosis* str. IP32953). Node length is indicated.

# Supplementary Figure S3

## Myristoylation site

|              |   |                              |                    |    |
|--------------|---|------------------------------|--------------------|----|
| HopZ1a       | 1 | MGNVCVG---                   | GSRMSHQVYSPDRADTPP | 25 |
| XopJ         | 1 | MGLCVSKPSVAGSPEHYAAHVAEQATPS | 28                 |    |
| HopZ2        | 1 | MGICVSKPSVRHDYNEGYRNYGADTAQ  | 28                 |    |
| <b>HopZ5</b> | 1 | MGLCASKPRTTSGYNTYASYNSSSTPE  | 28                 |    |

## Catalytic sites

|              |     |                           |                        |                                                            |                             |           |     |
|--------------|-----|---------------------------|------------------------|------------------------------------------------------------|-----------------------------|-----------|-----|
| PopP2        | 256 | DDGSH                     | TRAADIRK               | DASG-TSVIVVDPL-----RKEKDESAYVDYADNVNMEFGEHAKCAFIPVDIQKSFFD | CRILSLSLAL                  | 330       |     |
| AvrA         | 119 | SSGIH                     | ISVVDFRVM-DGKTSVILF    | EPA-----ACSAFGPALA-LRTKAALEREQLPDCYFAMVELDIQRSSSE          | CGIFSLALAK                  | 194       |     |
| YopJ         | 105 | EGGIH                     | FSVIDYKHI-NGKTSLILF    | EPA-----NFNSMGPAMLAIRTKTAIERYQLPDCFHSMVEMDIQRSSSE          | CGIFSFALAK                  | 181       |     |
| HopZ1a       | 146 | QTLKHHVMADVRLHQGGAPTIIITE | PAVIVG---ARYQQLQRHNLTL | EDLSESGVPLSQVAIIETQAQKTSDD                                 | CVMSLNYAI                   | 225       |     |
| XopJ         | 169 | RDGEH                     | HVAADVRRRRP            | NGEASVIVLEPA-----RLLTFVTGHTQLRRQALSQ                       | GENAKFAFIQVGAQKSAADCL       | MFDLHFAL  | 244 |
| PopP1        | 162 | PN-L                      | HHAADVRRHHEDGRTTVIILE  | EPA-----SAGNQENLPGYTELASALRYNLGSQCRMVVEIAEAQKSLSD          | CVAFALDFAL                  | 238       |     |
| HopZ2        | 156 | PPSLH                     | HVAADVRRNHSNGQKTLIVLE  | PITAYKDDVYPPAYLPGYPQLREEVNTRLRGN                           | AKMSVIETDAQRSWHDC           | VIFSLNFAL | 238 |
| AvrBsT       | 150 | PSSMH                     | HAAIDVRFK-DGKRTMLVIE   | PALAYGMKDGEIKVMAGYETL                                      | GKNVQNCLENGDMAVIQLGAQKSLFDC | VIFSLNMAL | 231 |
| <b>HopZ5</b> | 146 | PNSRH                     | HVAIDVRNQ-DDVRTMLIIE   | SALAYGKSNNATGFLPGYLQMHNNVKNYAQDNGRMAVIQLGVQKSKYDC          | IFSLNNAL                    | 227       |     |

## Autoacetylation-required site

|              |     |             |                                        |          |         |     |
|--------------|-----|-------------|----------------------------------------|----------|---------|-----|
| PopP2        | 373 | GAPLVDARMMK | HGQAASSVSRYLGNHPEQSTVPVNKR-----NETL    | GERTTRH  | 420     |     |
| AvrA         | 227 | ADRYLPVSFYK | HQTQGAQRLNEYVEANPAAGSSIVNKK-----NET    | LYERFDNN | 274     |     |
| YopJ         | 214 | LDPYLPVTFYK | HQTQGGKRLNEYLNTPQGVGTVVNKK-----NET     | IVNRFDNN | 261     |     |
| HopZ1a       | 279 | GADVLPVDFYK | HGASLTQAKQLMKRPDGRMAGRVNSE-GHSEAENLVQR | NQAF     | 330     |     |
| XopJ         | 290 | GEQMLPAIFYK | HHTHSSGVVEEVDRSQPGSAYTDVSTSGRQQHESLE   | QRVQAF   | 342     |     |
| PopP1        | 289 | GWGVLPPVYK  | HAHSRETLKGVKQRQPGSLETDVSTGRNKDGAESLE   | ERMEAF   | 341     |     |
| HopZ2        | 280 | GKQVLPVAVYK | HAHSRGTVTAVENAQPHIANDNVSTN-RSSSRETL    | NERAEAF  | 331     |     |
| AvrBsT       | 272 | GDKFLPPIFYK | HSHSRGVVGEFISNQPEYAHKNVSTG-RTNP        | SEDL     | SERVENF | 323 |
| <b>HopZ5</b> | 268 | GTKILPAVFFK | HHTSRSTINDAIEEQPELADRNVSTN-RESAHQTL    | SERVADF  | 319     |     |

**Supplementary Figure S3. HopZ5 shares predicted conserved residues with YopJ family members.** Critically conserved residues in selected YopJ family members are shown: Putatively myristoylated glycine highlighted in purple, acetyltransferase catalytic core histidine, glutamate and cysteine residues highlighted in orange, and autoacetylation-required lysine residue highlighted in blue.

## Supplementary Figure S4

HopZ5-C218A

HopZ5-G2A

+ DAPI

- DAPI

+ DAPI

- DAPI

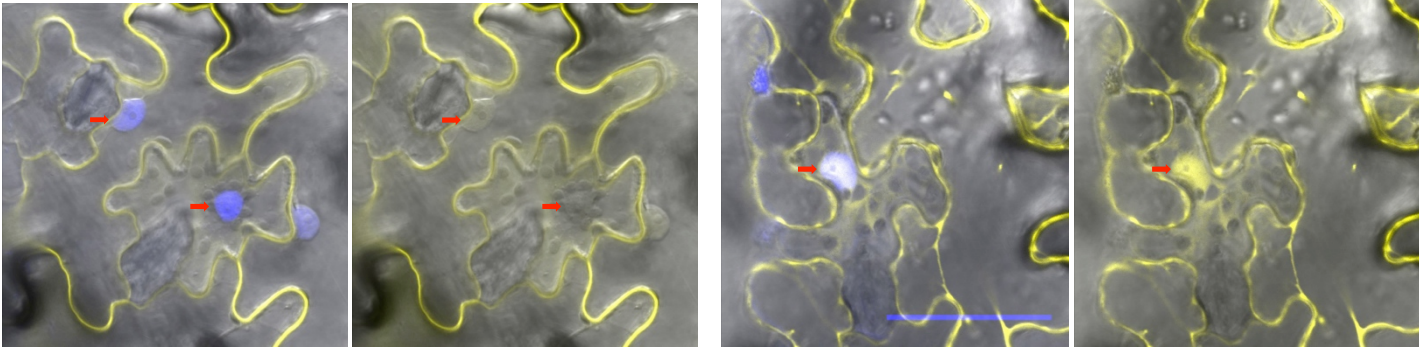

**Supplementary Figure S4. The G2A variant of HopZ5 localizes to the plant cell cytoplasm and nucleus.** *In planta* subcellular localization of HopZ5 variants was determined in *SGT1*-silenced *N. benthamiana*. Leaves were infiltrated with *Agrobacterium tumefaciens* AGL1 carrying YFP-tagged *hopZ5* (G2A) or *hopZ5* (C218A) under a constitutive CaMV 35S promoter. Leaf discs were taken at 2 days post infiltration, stained with DAPI, and visualized under confocal laser-scanning microscopy for localization of the DAPI signal and YFP tag. All panels are confocal images merged with corresponding bright-field images, with or without DAPI signal included as indicated. Red arrows indicate plant cell nuclei. The blue scale bar in G2A panel represents 50 μm.

## Supplementary Figure S5

### *Pto* DC3000

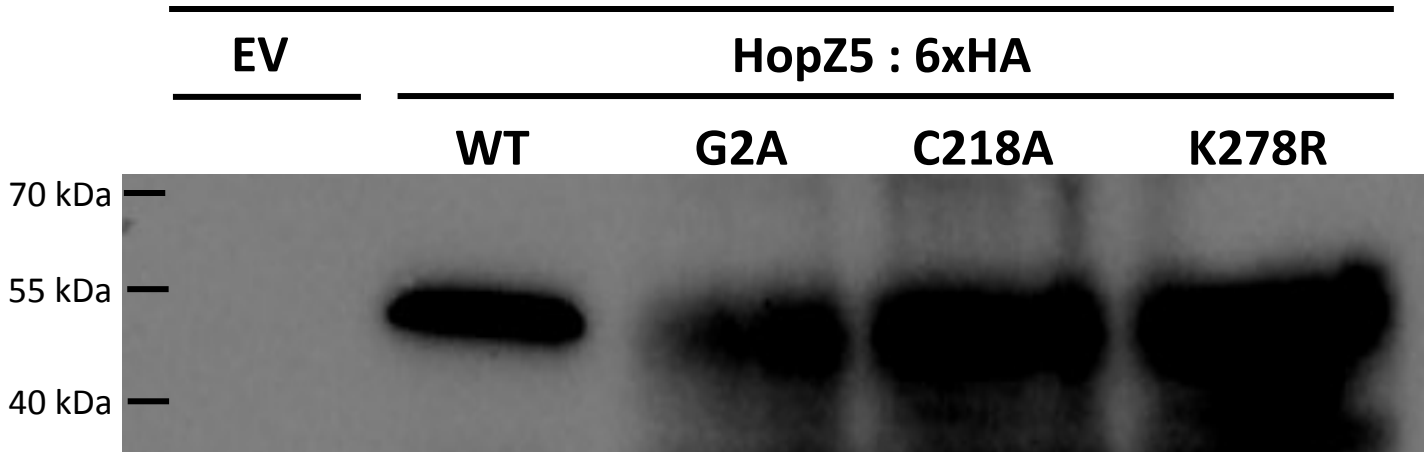

**Supplementary Figure S5. HopZ5 variants are unaffected in expression and protein stability in *Pto* DC3000.** *Pto* DC3000 carrying *hopZ5* (WT) or with mutated myristoylation (G2A), catalytic core (C218A), or autoacetylation-required (K278R) variants tagged with 6xHA were inoculated at  $OD_{600}=0.15$  and grown for 7 hours on type-III inducing minimal medium (Huynh et al. 1989)\*. Cells were harvested by centrifugation, boiled in 1xLeamli buffer and separated by SDS-PAGE for immunoblot using  $\alpha$ -HA antibody.

\*Huynh, T., Dahlbeck, D. & Staskawicz, B., Bacterial blight of soybean: regulation of a pathogen gene determining host cultivar specificity, *Science* **145**, 1374-1377 (1989)

## Supplementary Figure S6

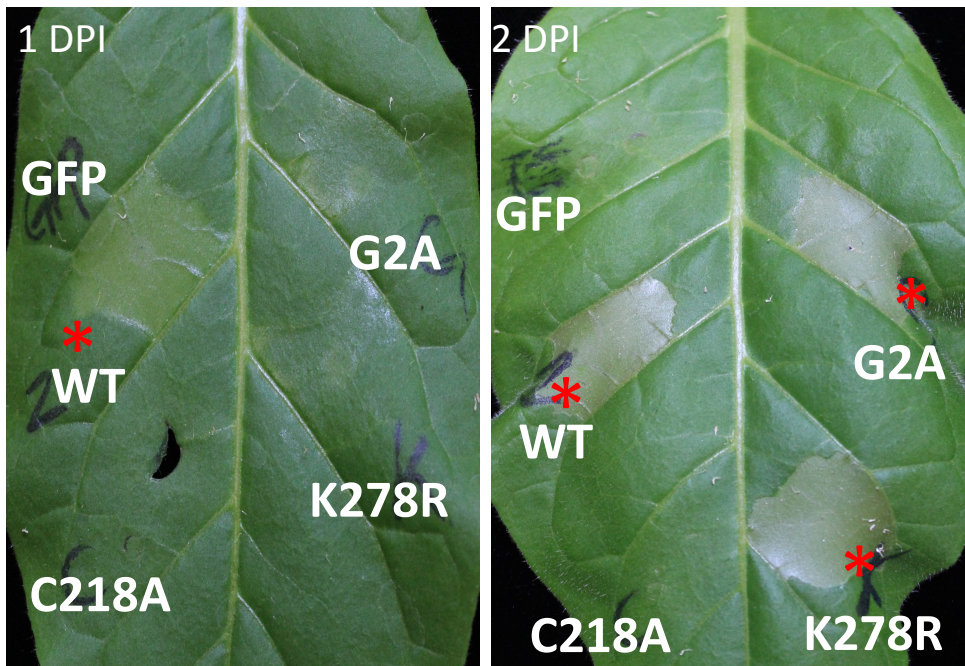

**Supplementary Figure S6. HopZ5 triggers a hypersensitive response in *Nicotiana tabacum* and requires G2, C218 and K278 residues.** HopZ5 (WT) with mutated myristoylation (G2A), catalytic core (C218A), or autoacetylation (K278R) variants tagged with 3xFLAG were transiently expressed under the constitutive CaMV 35S promoter in *Nicotiana tabacum*. Photographs were taken at 1-2 days post infiltration (dpi). Red asterisks indicate development of hypersensitive response-like cell death symptoms. This experiment was repeated five times with identical results.

## Supplementary Figure S7

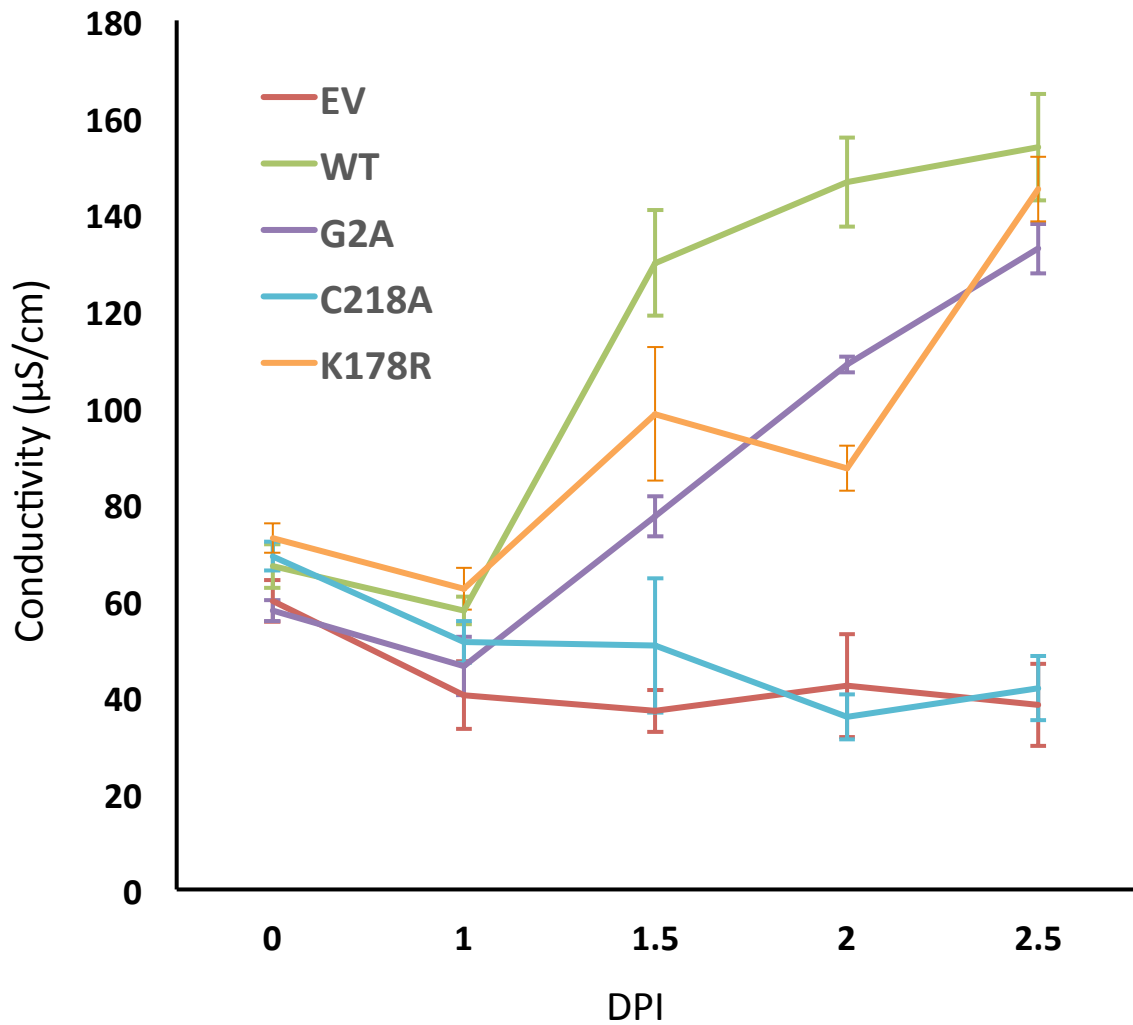

**Supplementary Figure S7. HopZ5 recognition in *Nicotiana benthamiana* requires acetyltransferase activity.** Electrolyte leakage from *N. benthamiana* leaf discs triggered by *Agrobacterium*-mediated transient expression of HopZ5 or variants was determined at multiple time points (dpi). Infiltrations were carried out by blunt syringe at  $\text{OD}_{600} = 0.4$  for all samples as described in Figure 5(b).



# Supplementary Table 1. Summary of phenotypes for HopZ5 variants by assay

| Assay                                                          | WT  | G2A   | K278R | C218A |
|----------------------------------------------------------------|-----|-------|-------|-------|
| HR ( <i>Pseudomonas</i> delivery)                              | +++ | +++   | -     | -     |
| Electrolyte leakage ( <i>Pseudomonas</i> delivery)             | +++ | ++    | -     | -     |
| Defence gene expression ( <i>Pseudomonas</i> delivery)         | +++ | + / - | -     | -     |
| <i>Pto</i> DC3000 growth restriction                           | +++ | +++   | + / - | -     |
| Defence gene expression (Col-0 stable expression)              | +++ | ++    | + / - | -     |
| <i>Pto</i> DC3000 growth restriction (Col-0 stable expression) | +++ | -     | -     | -     |
| HR ( <i>Nicotiana</i> agroinfiltration)                        | +++ | ++    | ++    | -     |
| Electrolyte leakage ( <i>Nicotiana</i> agroinfiltration)       | +++ | ++    | ++    | -     |

- +++ = strong phenotype with statistically significant difference compared to empty vector control
- ++ = intermediate phenotype with statistically significant difference compared to empty vector control
- +/- = weak phenotype; variable results and occasionally not statistically significant compared to empty vector control
- = not statistically significant as compared to empty vector control

Supplementary Table 2. Primers used for qPCR of marker genes

| Gene                            | Forward                  | Reverse                 |
|---------------------------------|--------------------------|-------------------------|
| <i>AtEF1<math>\alpha</math></i> | CAGGCTGATTGTGCTGTTCTTA   | GTTGTATCCGACCTTCTTCAGG  |
| <i>AtPBS3</i>                   | TTCGCTGGCTTGTATAGGATGA   | CTGGAAATGTTGAGGTGTCAGC  |
| <i>AtFMO1</i>                   | TGTGTTTGAAGATGGGACGACA   | GTTTCGAGCTGCTTTGGACGTAT |
| <i>AtWRKY51</i>                 | AGGAAGTATGGCAAGAAATCTG   | GAGTGTTGGTTCCAGTTATCAT  |
| <i>hopZ5</i>                    | TGCATCAAAACCCCGCAC       | GTGATATACCCTGACTGCC     |
| <i>AtPR1</i>                    | ATACACTCTGGTGGGCCTTACG   | TACACCTCACTTTGGCACATCC  |
| <i>NbACTIN</i>                  | GATGAAGATACTCACAGAAAGA   | GTGGTTTCATGAATGCCAGCA   |
| <i>NbSGT1</i>                   | TAATGTGTCATCAGATGCC      | ACTTCTTTCCAGTTTGTCGAC   |
| <i>NbNDR1</i>                   | TAGTAAAGTGAAAGTGGATGGTTC | GCAATCAACTGAGTCCAACAT   |
| <i>NbEDS1</i>                   | AACGAGGAAAAGATTGATGGTA   | TCCTTTCTTCCCTCAAACATATC |
